# Supplementary material for: Characterization of a Rh(iii) porphyrin–CO complex: its structure and reactivity with an electron acceptor
Source: Royal Society of Chemistry journal article supplement (doi:10.1039/c5dt01453k), 2015-01-01
Supplement: c5dt01453k1.pdf [file c5dt01453k1.pdf]

**Electronic supplementary information (ESI)**

**For**

**Characterization of a Rh(III) porphyrin-CO complex: its  
structure and reactivity with an electron acceptor**

Shin-ichi Yamazaki<sup>\*a</sup>, Masaru Yao<sup>a</sup>, Masafumi Asahi<sup>a</sup>, Hiroyasu Sato<sup>b</sup>,  
Akihito Yamano<sup>b</sup>, Tsutomu Ioroi<sup>a</sup>

*<sup>\*a</sup> Research Institute of Electrochemical Energy, Department of Energy and  
Environment, National Institute of Advanced Industrial Science and Technology,  
1-8-31, Midorigaoka, Ikeda, Osaka 563-8577, Japan.*

*E-mail: [s-yamazaki@aist.go.jp](mailto:s-yamazaki@aist.go.jp)*

*<sup>b</sup> Rigaku Corporation, 3-9-12 Matubara, Akishima, Tokyo 196-8666, Japan.*

## 1. Experimental Details

### 1.1. General

IR spectroscopy was recorded with FT-IR Spectrometer Frontier (Perkin Elmer). NMR spectra were obtained using JNM-ECA series (JEOL,  $\nu$  ( $^1\text{H}$ ) = 500 MHz). Chloroform-*d* and acetone-*d*<sub>6</sub> were used as a deuterated solvent for NMR analysis. These solvents contain tetramethylsilane (1%(v/v)) as an internal standard substance. The determination of CO is carried out using a gas chromatograph (Shimadzu, GC 2014) with a TCD detector. The water used in this study was purified with an Organo PURELAB Ultra Analytic and PURELITE PRB-002A unless otherwise stated.

### 1.2. Synthesis of $[\text{Rh}^{\text{III}}(\text{OEP})(\text{Cl})]$

2,3,7,8,12,13,17,18-Octaethylporphyrinato rhodium(III) chloride ( $[\text{Rh}^{\text{III}}(\text{OEP})(\text{Cl})]$ ) was synthesized by the reflux of  $\text{Rh}_2\text{Cl}_2(\text{CO})_4$  and 2,3,7,8,12,13,17,18-Octaethylporphyrine ( $\text{OEPH}_2$ ) in toluene according to a literature [1]. Purple crystals were obtained. ESI-MS (in ethanol):  $m/z$  635.2 ( $[\text{Rh}^{\text{III}}(\text{OEP})]^+$ ) Anal. Calcd for  $[\text{Rh}^{\text{III}}(\text{OEP})(\text{Cl})]\cdot\text{H}_2\text{O}$ : C, 62.74; H, 6.73; N, 8.13. Found: C, 62.63; H, 6.66; N, 8.10.  $^1\text{H}$ -NMR ( $\text{CDCl}_3$ , 500 MHz):  $\delta$  10.34 (s, 4H), 4.24-4.06 (m, 16H), 2.00 (t, 24H,  $J = 8$  Hz).  $^{13}\text{C}$ -NMR ( $\text{CDCl}_3$ , 125 MHz):  $\delta$  142.9, 140.5, 98.4, 20.1, 18.6.

### 1.3. Preparation and analysis of $[\text{Rh}^{\text{III}}(\text{OEP})(\text{CO})(\text{Cl})]$

[Rh<sup>III</sup>(OEP)(Cl)] was dissolved in CH<sub>2</sub>Cl<sub>2</sub>, and the resulting solution was bubbled with CO or <sup>13</sup>CO gas for 7 minutes. After bubbling, the solvent was allowed to evaporate, and the resulting crystalline powder was collected. The powder was subjected to IR analysis.

The crystalline powder of [Rh<sup>III</sup>(OEP)(CO)(Cl)] was recrystallized in a mixed solvent of hexane and CH<sub>2</sub>Cl<sub>2</sub> (9 : 2) to obtain good crystals that could be subjected to X-ray analysis. X-ray diffraction data were collected by a VariMax with Saturn 724+ (Rigaku) using MoK $\alpha$  radiation ( $\lambda = 0.71075 \text{ \AA}$ ) at a temperature of 93 K. Based on the results of DFT calculation [2] and IR analysis, the structure was solved under the restriction that the length of C20-O1 is in the range from 1.15  $\text{\AA}$  to 1.17  $\text{\AA}$ .

#### 1.4. The preparation of NQ<sub>red</sub>

The reduced form of NQ (NQ<sub>red</sub>) was prepared by the H<sub>2</sub>-reduction of NQ in the presence of a Pt catalyst. NQ (4.4  $\mu\text{mol}$ ) was dissolved in a mixed solvent of acetone-*d*<sub>6</sub> (0.9 mL) and water (0.1 mL). A platinized Pt plate was immersed in this solution. The solution was purged with argon gas for 10 minutes. After then, H<sub>2</sub> gas was passed through the solution to reduce NQ for 10 minutes. Concomitant with evaporation of acetone, acetone-*d*<sub>6</sub> was replenished.

#### 1.5. The reaction of [Rh<sup>III</sup>(OEP)(CO)(Cl)] with NQ

NQ (4.4  $\mu\text{mol}$ ) was dissolved in a mixed solvent of acetone-*d*<sub>6</sub> (0.9 mL) and water

(0.1 mL) in a vial with a rubber cap. Argon gas was passed through the solution to remove dissolved oxygen. This solution was added to the crystalline powder of  $[\text{Rh}^{\text{III}}(\text{OEP})(\text{CO})(\text{Cl})]$  (4.4  $\mu\text{mol}$ ) in a vial with a rubber cap under Ar-purge conditions, and the solution of  $[\text{Rh}^{\text{III}}(\text{OEP})(\text{CO})(\text{Cl})]$  and NQ was left under argon atmosphere for 10 minutes. The product solution was subjected to NMR analysis.

### 1.6. The catalytic CO oxidation by NQ in the presence of $[\text{Rh}^{\text{III}}(\text{OEP})(\text{Cl})]$

NQ (10 mM) was dissolved in a mixed solvent of acetone (4.45 mL) and water (0.5 mL), and the solution was purged with argon. CO gas was passed through the solution for 7 minutes.  $[\text{Rh}^{\text{III}}(\text{OEP})(\text{Cl})]$  (0.5  $\mu\text{mol}$ ), which was dissolved in acetone (50  $\mu\text{L}$ ), was injected to the NQ solution. After incubation at 25 °C for 1 hour, the gas phase was sampled and subjected to analysis with gas chromatography.

### Reference

- [1] S. Yamazaki, M. Yao, N. Fujiwara, Z. Siroma, K. Yasuda, T. Ioroi, *Chem. Commun.*, 2012, **48**, 4353-4355.
- [2] Gaussian 03, Revision E.01, M.J. Frisch, et al. Gaussian, Inc. Wallingford CT (2004).

**Table S1.** Summary of X-ray Crystallographic of [Rh<sup>III</sup>(OEP)(CO)(Cl)]

| Compound                                     | [Rh <sup>III</sup> (OEP)(CO)(Cl)]                                  |
|----------------------------------------------|--------------------------------------------------------------------|
| Empirical formula                            | C <sub>37</sub> H <sub>44</sub> N <sub>4</sub> O <sub>4</sub> RhCl |
| Formula weight                               | 699.13                                                             |
| Crystal system                               | Monoclinic                                                         |
| Space group                                  | <i>P</i> 2 <sub>1</sub> / <i>c</i>                                 |
| <i>a</i> , Å                                 | 12.620(3)                                                          |
| <i>b</i> , Å                                 | 8.246(2)                                                           |
| <i>c</i> , Å                                 | 19.435(5)                                                          |
| $\beta$ , deg                                | 100.522(4)                                                         |
| <i>V</i> , Å <sup>3</sup>                    | 1988.5(8)                                                          |
| <i>Z</i>                                     | 2                                                                  |
| <i>F</i> (000)                               | 896.00                                                             |
| <i>D</i> <sub>calc</sub> , g/cm <sup>3</sup> | 1.451                                                              |
| <i>T</i> , K                                 | 93                                                                 |
| Crystal size, mm <sup>3</sup>                | 0.100 X 0.050 X 0.010                                              |
| R1 [ <i>I</i> >2.0σ( <i>I</i> )]             | 0.0798                                                             |
| R1 [all data]                                | 0.0976                                                             |
| wR2 [ <i>I</i> >2.0 ( <i>I</i> )]            | 0.1531                                                             |
| wR2 [all data]                               | 0.1616                                                             |
| Goodness of fit indicator                    | 1.174                                                              |

**Table S2.** Selected bond lengths (Å) of [Rh<sup>III</sup>(OEP)(CO)(Cl)]

|         |           |
|---------|-----------|
| Rh1-C20 | 1.736(12) |
| C20-O1  | 1.144(16) |

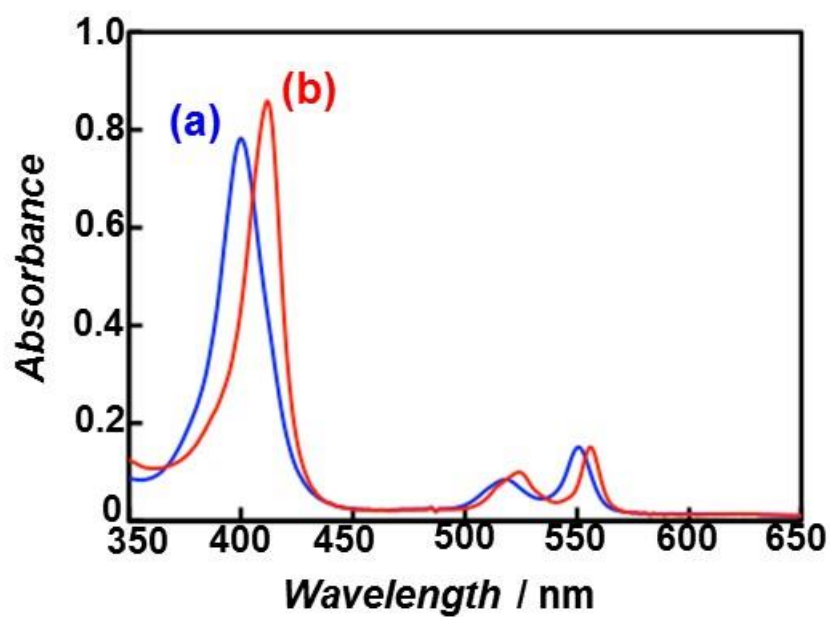

**Fig. S1.** UV spectra of  $[\text{Rh}^{\text{III}}(\text{OEP})(\text{Cl})]$  in  $\text{CH}_2\text{Cl}_2$  (a) before and (b) after the introduction of CO.

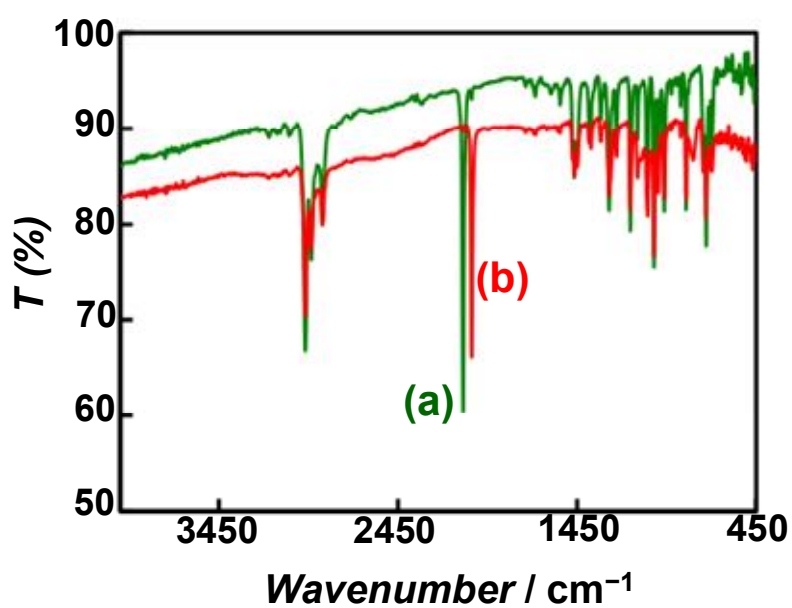

**Fig. S2.** IR spectra of (a)  $[\text{Rh}^{\text{III}}(\text{OEP})(^{12}\text{CO})(\text{Cl})]$  and (b)  $[\text{Rh}^{\text{III}}(\text{OEP})(^{13}\text{CO})(\text{Cl})]$ .
